# Supplementary material
Source: Springer Nature journal article supplement (https://www.springermedizin.de/resource/supplementary/12913_2013_3432_MOESM1_ESM.pdf/9532778)
Supplement: MOESM1 [file 9532778]

## Additional file 1:

### Detailed analysis of the gaps, challenges and barriers identified

**Table S1:** List of the thirteen gaps, challenges and barriers identified, with results of their secondary analysis using TDF domains.

| #  | Challenge                                                                                                    | TDF Domain                                    | Underlying determinant of the Challenge                                                                     |
|----|--------------------------------------------------------------------------------------------------------------|-----------------------------------------------|-------------------------------------------------------------------------------------------------------------|
| 1  | Challenges in overcoming patients' barriers and resistances                                                  | See main text of manuscript.                  |                                                                                                             |
| 2  | Challenges with the treatment decision-tree                                                                  | See main text of manuscript.                  |                                                                                                             |
| 3  | Challenges associated with the transition from childhood to teen years, to adulthood                         | See main text of manuscript.                  |                                                                                                             |
| 4  | Insurance companies processes interfere with clinical decisions                                              | "11 - Environmental Context and Resources"    | Insurance companies not following clinical guidelines in setting the requirements to approve medications    |
| 5  | Use of appropriate materials to support patient education                                                    | "1 – Knowledge"                               | Lack of knowledge of existing patient education tools to provide patients and caregivers                    |
|    |                                                                                                              | "11 - Environmental Context and Resources"    | Lack of available appropriate materials to support patient education.                                       |
| 6  | Referrals between general pediatricians and pediatric endocrinologists (timeliness, appropriate pre-testing) | "1 – Knowledge"                               | Knowledge of optimal timing of referral                                                                     |
|    |                                                                                                              |                                               | Knowledge in the screening and testing procedures for growth hormone deficiency in children                 |
|    |                                                                                                              | "4 - Beliefs about Capabilities"              | Confidence in the screening and testing procedures                                                          |
|    |                                                                                                              | "6 - Beliefs about Consequences"              | Lack of awareness on consequences of under- / over- referral                                                |
| 7  | Perceptions of GH therapy                                                                                    | "6 - Beliefs about Consequences"              | Concerns over long-time side-effects of growth hormone therapy                                              |
| 8  | Lack of clarity in roles and responsibilities                                                                | "3 - Social / Professional Role and Identity" | Lack of clarity in the professional boundaries between the roles of each provider                           |
| 9  | Application of diagnostic tests                                                                              | "2 – Skills"                                  | Challenges with selecting and interpreting growth hormone stimulation test                                  |
|    |                                                                                                              |                                               | Lack of confidence in selecting the appropriate form of growth hormone stimulation test                     |
|    |                                                                                                              | Lack                                          | Lack of confidence in formulating a differential diagnosis between the different pediatric growth disorders |
| 10 | Lack of screening by primary care                                                                            | "6 - Beliefs about Consequences"              | Lack of awareness on consequences of under-screening                                                        |
| 11 | Identifying tests needed for at risk co-morbidities                                                          | "2 – Skills"                                  | Challenges with selecting the proper test to assess at-risk co-morbidities                                  |
|    |                                                                                                              | "6 - Beliefs about Consequences"              | Lack of awareness on consequences of not appropriately testing for at-risk co-morbidities                   |

| #  | Challenge                        | TDF Domain                                 | Underlying determinant of the Challenge                                                                  |
|----|----------------------------------|--------------------------------------------|----------------------------------------------------------------------------------------------------------|
| 12 | Presenting Treatment as optional | "6 - Beliefs about Consequences"           | Perception that GH treatment is optional since AGHD is generally not life-threatening                    |
| 13 | Inconsistencies between labs     | "11 - Environmental Context and Resources" | Lack of consistency between results obtained by different laboratories (i.e., low inter-lab reliability) |
